# Supplementary material
Source: Research Square preprint supplement (doi:10.21203/rs.3.rs-9679264/v1)
Supplement: Supplementary file 1 [file 97c28775f92297060803a0ec.xlsx]

## Sheet: Sheet1
DFL1	DFL2	DFL3	DFL4	PU1	PU2	PU3	PU4	DT1	DT2	DT3	DT4	OLAI1	OLAI2	OLAI3	SOLU1	SOLU2	SOLU3	SOLU4	DFC1	DFC2	DFC3	DFC4	DFC5
5	5	4	4	4	5	5	4	5	5	4	4	4	4	3	3	4	3	4	4	4	4	3	4
4	4	5	5	5	4	5	5	4	5	5	5	3	4	4	4	4	3	4	4	4	3	4	4
5	5	4	4	5	4	3	4	5	5	5	5	4	4	3	4	4	4	4	3	4	4	4	3
5	5	5	4	4	5	5	4	5	5	4	5	4	4	3	4	4	4	3	4	4	3	4	3
5	5	5	4	5	5	5	4	5	4	5	5	4	4	3	4	4	4	3	3	4	4	4	4
5	5	4	4	5	5	4	4	5	5	5	4	4	4	4	3	4	4	4	4	3	4	4	4
5	5	4	5	5	4	4	5	5	5	5	4	4	4	4	3	4	4	4	3	4	4	3	4
5	5	4	4	5	5	5	4	5	5	5	5	4	3	4	4	3	4	4	4	3	3	4	4
4	4	4	4	4	4	3	3	3	4	4	4	3	3	3	3	3	3	3	3	3	3	3	3
5	5	4	4	5	5	4	5	5	5	4	5	4	4	4	4	3	4	4	4	3	4	4	4
2	1	5	4	3	5	5	5	5	5	5	5	4	3	3	2	2	2	2	2	4	2	1	1
5	5	4	5	5	5	4	4	5	5	5	5	3	4	4	4	3	4	4	4	3	4	4	3
4	4	3	4	5	4	4	5	3	4	4	3	3	3	3	3	2	3	3	3	3	3	2	2
5	4	5	5	5	4	5	5	4	5	5	5	3	4	4	4	4	3	4	4	4	3	4	3
4	5	5	5	5	5	4	5	5	4	5	5	4	3	3	4	4	3	4	4	4	4	4	3
5	5	4	5	5	5	4	4	3	4	5	5	4	3	4	4	4	3	4	4	3	3	4	4
5	5	4	4	5	5	5	5	4	5	5	5	4	3	3	4	4	4	3	4	4	4	4	3
4	5	5	5	5	5	4	5	5	5	4	5	4	4	3	4	4	4	3	3	4	4	4	3
5	5	5	5	5	5	5	5	5	5	5	5	4	4	4	4	4	4	4	4	4	4	4	4
5	5	4	5	5	5	5	4	5	4	4	5	4	4	4	3	4	4	4	3	4	4	3	3
5	5	4	5	5	5	4	5	5	5	5	4	4	4	4	3	4	3	3	4	3	4	4	3
5	5	5	4	5	5	5	5	4	4	4	5	4	4	3	4	4	4	3	4	4	4	3	4
1	1	1	1	1	1	1	1	1	1	2	2	3	3	4	3	4	4	3	4	4	4	4	4
1	2	2	1	1	1	2	1	2	2	1	1	1	2	1	1	1	2	2	1	1	2	1	1
4	5	4	5	3	4	4	4	5	5	5	5	3	4	4	1	3	4	4	4	4	4	4	4
5	5	4	5	5	4	4	5	5	4	5	5	3	4	4	4	4	3	4	4	4	3	3	4
4	5	5	5	4	5	5	5	4	5	5	5	3	4	4	3	4	4	4	3	4	4	4	3
5	5	4	5	5	5	4	4	5	5	4	5	4	4	3	3	4	4	4	3	3	3	4	4
5	5	4	5	5	4	4	5	5	5	5	4	3	4	4	4	3	3	4	4	4	4	3	4
5	5	5	5	5	5	5	1	5	5	5	5	3	4	4	4	4	4	4	4	4	4	4	4
5	5	5	4	4	5	5	5	5	5	4	5	2	1	2	4	4	3	4	4	4	3	4	4
5	5	5	5	5	5	5	5	5	5	5	5	4	4	4	4	4	4	4	4	4	4	4	4
5	5	5	5	4	2	2	3	4	5	5	4	3	3	3	3	4	3	4	4	4	4	4	4
5	5	4	4	5	5	4	4	5	5	5	4	4	4	4	4	3	4	4	4	4	3	3	4
5	5	4	5	5	5	4	4	5	5	5	4	3	4	4	4	4	4	3	4	4	4	3	3
4	5	5	5	4	4	5	5	5	5	4	4	4	4	4	3	4	4	3	3	4	4	4	3
4	4	4	5	5	3	4	5	3	5	4	4	4	4	4	3	3	4	4	4	4	3	4	4
3	3	3	3	2	2	2	2	1	1	1	1	2	2	2	2	2	2	2	2	2	2	2	2
4	5	5	5	5	4	5	5	5	4	5	5	4	3	4	4	4	3	3	4	4	4	3	3
4	5	3	4	4	3	4	4	4	4	4	4	4	4	4	4	4	4	4	4	4	3	4	4
3	4	4	3	3	3	3	4	3	3	3	3	3	3	3	3	3	3	3	3	3	3	3	3
3	3	2	3	1	1	1	1	1	2	2	3	4	4	4	4	4	4	4	4	4	3	4	4
2	2	1	1	2	2	3	3	3	3	3	3	2	2	2	3	3	3	3	3	3	3	3	3
4	4	4	4	4	5	5	5	3	5	4	3	4	4	3	4	4	3	4	4	4	4	4	4
5	5	5	5	5	5	5	5	4	3	4	3	3	3	3	3	3	3	3	4	4	4	4	4
5	4	4	4	5	4	5	5	5	4	4	4	4	4	3	3	4	3	4	4	3	3	4	4
5	5	5	5	3	2	2	3	4	5	4	4	4	4	3	3	1	1	2	3	2	3	2	2
4	4	4	4	4	4	4	4	4	4	4	4	3	3	3	3	3	3	3	3	3	3	3	3
3	3	5	5	4	4	3	3	4	4	4	4	3	3	4	3	2	2	3	4	3	3	3	3
3	2	3	3	2	2	2	2	2	2	2	2	1	1	1	1	1	1	1	1	1	1	2	2
5	5	4	4	5	5	5	5	4	5	5	5	4	3	3	4	4	4	3	4	4	4	4	4
4	5	5	5	4	5	5	5	5	5	5	4	4	4	4	3	4	4	4	3	3	4	4	4
5	5	4	4	5	5	5	4	4	5	5	5	4	3	4	4	4	4	3	3	4	4	3	4
4	4	5	5	5	5	5	4	4	5	5	5	4	3	4	4	4	3	3	4	4	3	3	4
4	4	5	5	5	5	4	5	5	5	5	4	3	3	4	4	4	4	3	4	4	4	3	3
4	4	5	5	5	5	4	5	5	5	4	4	4	4	4	3	4	4	4	4	4	3	3	4
5	5	5	4	4	5	5	5	4	5	5	5	4	4	3	3	4	4	4	4	3	3	4	4
4	5	5	5	5	5	4	4	4	5	5	5	4	4	3	4	4	4	4	4	3	3	3	4
5	5	5	5	4	5	5	5	4	4	5	5	3	4	4	4	4	4	4	4	4	4	4	4
5	5	4	4	5	5	4	4	5	5	5	4	3	4	4	4	4	3	4	4	4	3	3	4
4	4	5	5	5	5	5	4	4	5	5	5	4	4	3	4	4	3	3	4	4	4	3	4
5	5	4	4	5	5	4	5	5	5	4	5	4	4	3	3	4	4	4	4	3	3	4	4
4	4	5	5	5	5	4	5	5	5	5	4	4	4	3	3	4	4	4	3	4	4	3	4
5	5	4	4	5	5	4	4	4	5	5	5	4	4	3	4	4	4	3	4	4	4	4	3
4	5	5	5	4	5	5	5	4	5	4	3	3	4	4	4	3	4	4	4	3	3	4	3
5	5	4	4	5	5	5	5	4	4	5	5	4	3	4	3	3	4	4	4	4	4	3	3
5	5	5	4	4	5	5	4	5	5	5	4	3	4	4	3	3	4	4	4	3	4	4	3
5	5	4	5	5	5	4	4	4	5	4	5	4	3	4	4	3	3	4	4	3	4	4	3
4	4	5	5	5	4	5	5	5	4	4	5	4	3	4	4	3	4	4	4	4	3	3	4
2	1	2	2	2	2	3	2	2	3	2	2	1	2	2	2	2	1	2	2	2	2	2	2
4	5	3	5	2	3	1	4	4	4	4	4	1	1	1	1	4	2	4	4	4	3	3	4
4	3	4	5	1	2	3	2	4	4	5	1	2	1	1	2	4	2	4	4	3	3	3	4
4	4	4	4	4	4	4	4	3	4	4	4	2	2	2	2	2	2	2	3	3	3	3	3
5	5	4	5	5	4	4	5	5	5	5	4	4	4	4	3	4	3	3	4	4	3	3	4
5	4	5	5	5	5	5	4	5	5	5	4	4	3	3	4	4	3	4	4	3	4	4	3
5	5	4	4	5	5	5	5	4	5	5	5	4	4	3	4	4	4	3	3	4	4	3	4
5	5	4	5	4	4	5	5	4	5	5	4	3	4	4	3	4	4	3	3	4	4	3	4
4	5	3	3	5	3	5	5	1	1	1	1	1	3	3	2	4	1	4	4	4	4	4	4
5	5	4	5	5	4	5	5	4	4	5	5	4	4	4	3	3	4	4	3	4	3	3	4
5	4	5	5	5	5	4	5	5	5	4	5	4	4	3	4	4	3	4	4	4	3	3	4
5	5	4	4	5	5	5	4	4	5	5	5	4	4	3	4	4	4	3	3	4	4	4	3
4	5	5	5	4	5	5	5	4	5	5	5	3	4	4	4	3	3	4	4	4	3	4	4
5	5	4	5	5	5	5	4	4	4	4	3	4	4	4	4	4	4	4	4	4	4	4	4
3	3	5	5	5	5	3	4	2	2	2	2	3	3	4	3	4	1	4	4	4	4	4	3
5	5	4	5	5	4	5	5	5	4	4	5	4	4	3	4	4	4	3	3	4	4	3	4
5	5	4	5	5	5	4	5	5	5	4	4	4	4	4	3	3	4	4	4	4	3	4	4
4	4	5	5	4	5	5	5	4	5	5	5	3	4	4	4	3	3	4	4	4	3	4	4
5	5	4	4	5	5	5	4	5	5	5	5	3	3	4	4	4	3	4	4	3	3	4	4
5	5	4	4	5	5	5	5	4	5	5	5	4	3	4	4	4	3	3	4	3	4	4	4
4	4	5	5	4	5	5	5	5	4	4	5	4	4	4	4	3	4	4	4	3	3	4	4
5	5	4	4	4	5	5	4	4	5	5	4	3	4	4	4	3	4	4	4	3	4	4	4
4	5	5	5	4	4	5	4	5	5	5	5	4	3	4	4	3	3	4	4	4	3	3	4
5	5	4	4	5	5	4	5	5	5	5	4	3	4	4	4	3	4	4	4	3	3	4	4
4	5	5	5	4	5	5	5	4	4	5	5	4	4	4	3	4	4	4	3	4	4	3	4
5	5	5	5	4	5	4	5	5	5	5	1	4	3	1	3	4	3	4	4	4	4	4	4
3	4	2	3	3	3	3	3	2	3	3	3	2	3	2	3	4	3	4	3	3	4	4	3
4	4	3	4	5	5	5	5	3	3	3	3	3	4	3	4	4	3	4	3	3	3	3	3
3	2	4	3	2	4	3	2	4	3	4	2	3	1	2	3	2	3	2	3	2	2	3	3
5	5	4	4	4	5	4	4	4	4	4	4	4	4	4	4	4	4	4	4	4	4	4	4
2	2	2	2	2	2	2	2	3	3	2	3	4	2	2	3	4	4	4	1	2	3	4	3
3	4	2	2	5	5	5	5	3	4	4	1	4	4	4	4	4	2	4	4	4	4	4	4
3	2	2	2	1	2	2	3	3	3	4	3	2	2	3	3	2	2	1	2	2	3	3	2
5	4	4	4	5	5	5	4	4	5	5	4	3	4	4	4	4	4	3	3	2	3	3	4
5	4	4	5	5	5	4	5	5	5	4	3	3	4	4	3	3	4	4	4	3	4	4	3
4	4	5	5	4	5	5	5	4	3	4	4	3	2	3	3	4	4	4	4	3	4	4	3
4	4	5	5	5	4	4	4	4	3	4	4	4	4	4	3	3	4	4	3	4	4	3	4
4	5	5	5	4	4	3	4	5	5	4	5	4	3	3	4	4	3	4	4	4	3	3	4
5	5	5	5	4	4	5	5	5	5	4	4	3	4	4	3	4	4	4	3	3	4	4	3
4	5	5	4	4	5	4	5	5	5	4	4	3	4	3	4	3	3	4	4	4	3	4	3
4	3	4	5	5	4	5	4	3	3	4	4	4	4	3	3	4	3	3	4	4	3	4	3
4	5	5	4	3	3	4	5	5	4	4	3	3	4	4	4	3	4	3	3	2	3	4	3
5	5	4	4	5	4	5	5	3	4	3	4	3	4	4	3	4	3	3	3	4	4	3	4
5	4	5	5	4	4	5	5	4	3	4	5	4	3	3	4	3	4	3	4	4	3	4	4
4	5	4	3	3	4	4	5	5	5	4	4	4	3	4	4	3	3	2	3	4	4	3	4
5	5	4	4	5	5	5	4	5	5	5	5	3	3	4	3	4	4	4	4	3	2	3	3
5	5	4	5	5	5	4	4	4	5	5	4	4	4	3	4	4	4	3	4	3	4	4	4
5	5	4	5	5	5	4	4	4	5	5	4	4	4	3	4	4	4	3	4	3	4	4	4
5	5	4	4	5	4	3	3	4	4	5	5	3	3	4	3	4	4	3	3	4	3	4	3
4	4	4	4	4	5	5	4	4	4	4	4	4	3	3	4	4	3	4	3	3	3	4	4
4	4	4	4	5	5	5	5	4	4	4	4	4	4	4	4	4	3	3	4	4	3	4	4
4	4	5	4	4	4	4	4	5	5	5	5	3	3	3	3	4	3	3	4	3	3	4	4
5	5	4	4	4	5	5	5	4	4	5	5	4	4	3	3	3	4	4	4	4	4	4	3
5	5	5	4	4	5	5	4	5	4	5	5	3	3	3	3	4	4	4	4	3	4	4	4
5	5	5	4	4	5	4	5	5	4	5	5	4	4	3	4	4	4	4	4	4	3	3	3
4	5	5	5	4	3	4	4	5	5	5	4	4	4	3	3	4	4	3	2	3	3	4	3
5	5	4	4	5	5	5	4	4	5	4	4	3	3	3	4	4	4	4	4	4	4	4	4
5	5	5	4	4	4	5	5	5	5	5	5	4	4	4	4	4	3	3	3	4	4	4	4
4	4	4	4	4	4	4	4	4	4	4	4	4	4	4	4	3	3	3	4	4	4	4	4
4	4	5	5	5	4	3	3	4	4	3	3	3	3	4	4	3	3	2	3	4	4	3	3
5	5	4	5	5	5	5	4	4	4	4	5	4	4	4	3	3	4	4	4	4	4	4	4
2	1	1	2	2	1	1	2	3	2	2	1	2	2	2	1	1	2	2	1	2	2	1	1
5	5	5	5	5	5	5	5	4	4	4	4	4	4	4	3	4	4	3	4	4	4	4	4
4	4	5	5	5	4	3	4	4	5	5	4	3	4	4	3	3	2	3	4	4	4	3	4
4	3	3	4	4	5	4	5	5	4	4	3	3	4	4	3	4	4	3	3	4	4	3	4
4	5	4	4	3	4	4	5	5	4	5	4	2	3	3	4	4	3	4	4	4	3	3	4
4	4	4	4	5	5	5	5	4	4	4	4	4	4	4	3	3	3	4	4	4	4	4	4
5	5	4	4	3	4	4	5	5	4	5	5	4	3	4	3	3	4	4	3	3	4	4	3
4	5	5	4	5	4	5	5	5	4	3	4	3	4	4	3	4	3	4	4	4	3	4	3
5	5	5	5	4	4	4	5	5	5	5	5	4	4	4	4	4	4	4	3	3	4	4	4
5	5	4	4	5	4	3	3	4	4	5	5	3	4	4	4	3	3	4	3	4	4	3	4
4	4	4	4	4	4	4	4	5	5	5	5	4	4	4	4	4	4	4	4	4	3	3	3
5	5	5	5	4	4	4	4	4	4	4	4	3	4	4	4	4	3	3	3	4	4	4	4
4	4	3	4	4	5	5	5	4	4	4	4	4	4	4	4	4	3	4	4	4	3	3	4
5	5	5	4	4	4	4	5	5	5	4	4	4	4	4	4	4	4	4	3	3	4	4	4
5	5	5	5	4	4	4	4	5	5	5	4	3	4	4	3	4	4	4	4	3	4	4	4
5	5	5	4	4	4	4	4	4	5	5	5	3	4	4	3	4	4	4	3	3	4	4	4
5	5	5	5	4	4	4	4	4	4	4	4	4	4	4	3	3	4	4	4	4	4	4	4
3	2	2	2	2	2	2	2	3	3	3	4	3	3	3	3	3	3	3	2	2	2	2	2
4	4	4	4	5	5	5	5	4	4	4	4	4	4	4	4	4	4	4	4	4	4	4	4
4	4	5	5	5	4	5	5	5	4	4	3	3	4	4	4	4	3	3	4	4	4	3	4
4	4	4	4	4	5	5	4	4	5	4	5	4	4	4	4	4	3	3	4	4	3	4	4
5	5	4	4	5	5	5	4	4	4	5	5	4	4	4	4	4	4	4	3	3	4	4	4
4	5	4	4	5	5	4	4	5	5	5	4	4	4	4	4	4	4	4	3	3	4	4	4
5	5	5	5	4	4	4	4	5	5	5	4	4	4	4	3	3	3	4	4	4	4	4	4
4	4	4	4	4	4	4	5	5	5	5	5	4	4	3	3	4	4	4	4	4	4	4	4
4	4	4	5	5	5	5	5	4	4	5	5	4	4	4	4	4	4	4	4	4	4	4	4
3	3	4	4	4	4	4	4	4	4	4	4	4	4	4	4	4	4	4	4	4	4	4	4
5	5	4	4	4	4	4	4	5	5	5	5	4	4	4	3	3	3	3	4	4	4	4	4
5	5	5	4	4	4	3	5	5	5	5	5	4	4	4	4	3	3	4	4	4	4	4	4
5	5	5	5	5	5	5	5	4	4	4	4	4	4	4	4	4	4	4	4	4	4	4	4
5	5	4	4	3	4	4	4	4	4	4	4	4	4	4	4	4	4	4	4	4	4	4	4
5	5	5	5	4	4	5	5	5	5	5	5	4	4	4	4	4	4	4	4	4	3	4	4
4	4	4	4	5	5	4	5	5	5	5	5	4	4	3	4	4	4	4	4	4	4	4	4
5	5	5	5	4	4	4	4	5	5	5	4	4	4	4	4	4	4	4	4	4	4	4	4
2	2	1	2	3	2	2	2	1	2	2	2	2	1	1	1	2	2	2	1	2	2	3	2
4	4	4	5	5	5	5	5	5	5	4	4	4	4	4	4	4	4	4	4	4	4	3	3
5	5	5	4	4	4	5	5	5	5	5	5	4	4	4	4	4	4	4	4	4	4	4	4
3	3	3	4	4	4	4	4	4	4	4	4	3	3	3	3	3	3	3	4	4	4	4	4
5	5	5	5	4	4	4	4	5	5	5	4	4	4	4	4	4	4	4	4	4	4	4	4
5	5	5	5	5	5	5	5	4	4	4	4	4	4	4	4	4	4	4	4	4	4	4	4
3	3	3	4	1	1	1	2	2	2	3	4	2	1	1	1	1	1	1	1	2	2	3	2
4	4	4	4	4	4	3	5	3	3	3	3	3	3	3	3	3	3	3	3	3	3	3	3
4	4	5	5	3	4	4	3	4	4	4	4	2	3	2	2	2	2	2	2	3	3	3	3
3	3	4	5	5	4	5	5	4	4	4	4	4	4	4	3	4	4	4	4	3	3	3	4
3	3	5	5	5	5	5	5	4	3	4	4	3	2	3	3	4	4	4	3	3	4	4	4
5	5	5	5	5	5	5	4	4	4	4	5	4	4	4	4	4	4	4	4	4	4	4	3
3	3	2	3	3	3	3	3	3	3	3	3	3	3	3	2	3	2	2	3	2	3	2	3
4	4	4	4	3	3	3	3	3	3	3	3	3	3	3	3	3	3	3	3	3	3	3	3
5	5	5	5	4	4	4	4	5	5	5	4	4	4	4	4	4	4	4	4	4	4	4	4
5	5	5	5	4	4	4	4	4	5	5	5	4	4	4	4	4	4	4	3	3	4	4	4
4	4	4	4	4	4	4	4	4	4	4	4	3	3	3	3	3	3	3	3	3	3	3	3
4	4	4	5	5	5	5	5	5	4	5	4	4	3	4	4	4	3	3	4	3	3	4	3
5	5	5	5	5	5	5	5	5	5	5	5	4	4	4	4	4	4	4	4	4	4	4	4
4	4	4	4	4	4	4	4	4	4	4	4	4	4	4	4	4	4	4	4	4	4	4	4
5	5	5	5	4	4	4	3	4	4	4	5	4	4	4	4	4	4	4	4	3	3	3	4
4	4	4	4	4	5	5	5	5	5	5	5	4	3	4	4	4	4	4	4	4	4	4	4
2	3	3	2	2	3	3	3	2	3	3	4	1	1	2	2	3	3	2	4	1	3	2	3
5	5	5	5	4	4	4	4	4	4	4	4	4	4	3	4	4	4	4	4	4	4	4	4
4	5	5	4	5	5	5	5	3	5	5	5	3	3	3	3	4	3	3	4	4	3	3	3
5	5	4	4	4	5	4	5	4	4	4	4	4	4	4	4	4	4	4	4	4	4	4	4
5	4	4	5	4	5	4	4	3	4	5	5	4	3	4	4	4	4	3	3	4	4	4	3
5	4	4	5	5	5	5	4	5	5	5	5	4	4	4	4	4	4	4	4	4	4	4	4
1	1	1	1	3	4	3	4	4	4	2	5	3	3	4	4	4	4	4	4	4	4	4	4
4	4	4	4	4	4	4	4	5	5	5	5	4	4	4	4	4	4	4	4	4	4	4	4
3	4	4	5	5	5	5	4	4	3	4	5	4	3	4	4	4	4	3	3	4	4	3	3
4	4	3	4	5	5	4	5	5	4	3	3	3	3	4	4	4	3	4	4	3	3	4	4
1	1	1	2	2	2	1	2	1	1	2	2	1	2	2	1	2	2	2	1	1	1	2	1
4	5	5	5	5	5	5	5	5	5	5	5	3	3	3	3	4	4	4	4	4	4	4	4
4	4	5	5	5	4	5	5	5	5	4	5	4	4	3	4	4	3	3	4	4	4	3	4
5	5	4	4	5	5	4	3	3	4	4	5	4	4	3	4	4	3	4	3	3	4	4	3
5	5	5	5	5	5	5	5	5	5	5	5	4	4	4	4	4	4	4	4	4	4	4	4
3	4	4	5	5	4	5	5	5	4	4	4	4	3	4	3	3	2	3	3	3	4	4	3
5	5	4	3	4	4	4	5	5	4	4	5	4	3	3	4	4	3	3	4	4	3	3	4
5	5	4	5	5	5	4	4	5	5	5	5	4	4	4	4	4	4	4	4	4	4	4	4
4	5	4	4	5	5	5	4	4	4	5	4	4	4	3	4	3	3	4	4	3	4	3	4
4	5	5	5	4	4	3	4	5	5	4	5	4	4	3	3	4	3	4	4	4	3	3	4
4	5	5	5	4	5	5	4	4	3	4	5	4	3	3	4	4	4	3	3	4	4	4	3
4	4	5	5	5	4	4	5	5	5	4	4	4	4	4	3	4	3	3	3	4	4	4	3
4	4	5	5	5	5	4	4	5	5	4	5	4	3	4	4	4	3	4	4	4	4	3	3
5	4	4	5	5	5	4	4	3	4	5	5	4	3	3	4	4	3	3	2	3	3	4	4
5	4	4	4	5	5	4	5	5	5	4	5	4	3	3	4	4	4	3	4	3	3	4	3
5	5	4	4	5	5	5	4	4	5	4	5	4	3	3	4	4	3	4	3	4	4	3	4
4	4	5	5	5	4	5	5	5	4	5	5	4	3	3	4	4	3	4	4	4	3	3	4
4	5	5	5	4	5	5	5	5	4	5	5	3	4	4	4	3	3	4	4	4	3	4	3
5	5	4	4	4	5	5	5	4	4	5	5	3	4	4	3	2	3	2	2	2	3	2	2
2	1	1	1	2	1	1	2	1	1	2	1	1	2	2	1	1	2	2	1	2	1	2	1
5	5	4	4	4	5	5	5	4	4	4	5	4	4	4	4	3	4	4	4	3	4	4	4
5	5	4	4	5	5	5	5	4	4	5	5	3	4	4	4	3	4	3	4	3	3	4	3
5	5	4	4	5	5	5	4	3	4	5	5	4	3	4	4	4	3	4	4	3	3	4	3
5	5	4	4	5	5	5	5	4	5	5	5	3	4	4	4	3	3	4	3	4	4	4	3
5	5	4	4	4	5	5	4	5	5	4	4	4	4	3	3	4	3	4	4	4	4	3	4
4	4	5	5	5	4	5	5	4	5	5	5	3	4	4	4	4	3	4	4	4	3	4	4
5	5	4	4	5	4	3	4	5	5	5	5	4	4	3	4	4	4	4	3	4	4	4	3
5	5	5	4	4	5	5	4	5	5	4	5	4	4	3	4	4	4	3	4	4	3	4	3
5	5	5	4	5	5	5	4	5	4	5	5	4	4	3	4	4	4	3	3	4	4	4	4
5	5	4	4	5	5	4	4	5	5	5	4	4	4	4	3	4	4	4	4	3	4	4	4
5	5	4	5	5	4	4	5	4	4	5	5	4	4	4	4	3	4	4	4	4	3	4	4
4	5	5	5	4	5	5	4	4	5	5	4	4	4	4	3	3	4	4	4	3	4	4	4
4	4	4	4	5	5	4	5	5	4	4	5	3	4	4	4	4	3	4	4	4	4	3	4
5	4	5	4	5	4	5	4	5	4	5	4	4	3	4	3	4	3	4	3	4	3	4	3
3	3	4	4	3	3	4	4	3	3	4	4	3	3	4	4	3	3	4	4	3	3	4	4
4	3	3	4	4	3	3	4	4	3	3	4	4	3	3	4	4	3	3	4	4	3	3	4
3	4	4	3	3	4	4	3	3	4	4	3	3	4	4	3	3	4	4	3	3	4	4	3
3	3	3	3	4	4	4	4	3	3	3	3	4	4	4	4	3	3	3	3	4	4	4	4
4	4	4	4	3	3	3	3	4	4	4	4	3	3	3	3	4	4	4	4	3	3	3	3
1	1	2	2	1	1	2	2	1	1	2	2	1	1	2	2	1	1	2	2	1	1	2	2
2	2	1	1	2	2	1	1	2	2	1	1	2	2	1	1	2	2	1	1	2	2	1	1
1	2	1	2	1	2	1	2	1	2	1	2	1	2	1	2	1	2	1	2	1	2	1	2
2	1	2	1	2	1	2	1	2	1	2	1	2	1	2	1	2	1	2	1	2	1	2	1
2	2	2	2	1	1	1	1	2	2	2	2	1	1	1	1	2	2	2	2	1	1	1	1
5	5	4	4	4	5	5	4	5	5	4	4	4	4	3	3	4	3	4	4	4	4	3	4
4	4	5	5	5	4	5	5	4	5	5	5	3	4	4	4	4	3	4	4	4	3	4	4
5	5	4	4	5	4	3	4	5	5	5	5	4	4	3	4	4	4	4	3	4	4	4	3
5	5	5	4	4	5	5	4	5	5	4	5	4	4	3	4	4	4	3	4	4	3	4	3
5	5	5	4	5	5	5	4	5	4	5	5	4	4	3	4	4	4	3	3	4	4	4	4
5	5	4	4	5	5	4	4	5	5	5	4	4	4	4	3	4	4	4	4	3	4	4	4
5	5	4	5	5	4	4	5	4	4	5	5	4	4	4	4	3	4	4	4	4	3	4	4
4	5	5	5	4	5	5	4	4	5	5	4	4	4	4	3	3	4	4	4	3	4	4	4
4	4	4	4	5	5	4	5	5	4	4	5	3	4	4	4	4	3	4	4	4	4	3	4
5	4	5	4	5	4	5	4	5	4	5	4	4	3	4	3	4	3	4	3	4	3	4	3
3	3	4	4	3	3	4	4	3	3	4	4	3	3	4	4	3	3	4	4	3	3	4	4
4	3	3	4	4	3	3	4	4	3	3	4	4	3	3	4	4	3	3	4	4	3	3	4
3	4	4	3	3	4	4	3	3	4	4	3	3	4	4	3	3	4	4	3	3	4	4	3
3	3	3	3	4	4	4	4	3	3	3	3	4	4	4	4	3	3	3	3	4	4	4	4
4	4	4	4	3	3	3	3	4	4	4	4	3	3	3	3	4	4	4	4	3	3	3	3
1	1	2	2	1	1	2	2	1	1	2	2	1	1	2	2	1	1	2	2	1	1	2	2
2	2	1	1	2	2	1	1	2	2	1	1	2	2	1	1	2	2	1	1	2	2	1	1
1	2	1	2	1	2	1	2	1	2	1	2	1	2	1	2	1	2	1	2	1	2	1	2
2	1	2	1	2	1	2	1	2	1	2	1	2	1	2	1	2	1	2	1	2	1	2	1
2	2	2	2	1	1	1	1	2	2	2	2	1	1	1	1	2	2	2	2	1	1	1	1
5	5	4	4	4	5	5	4	5	5	4	4	4	4	3	3	4	3	4	4	4	4	3	4
4	4	5	5	5	4	5	5	4	5	5	5	3	4	4	4	4	3	4	4	4	3	4	4
5	5	4	4	5	4	3	4	5	5	5	5	4	4	3	4	4	4	4	3	4	4	4	3
5	5	5	4	4	5	5	4	5	5	4	5	4	4	3	4	4	4	3	4	4	3	4	3
5	5	5	4	5	5	5	4	5	4	5	5	4	4	3	4	4	4	3	3	4	4	4	4
5	5	4	4	5	5	4	4	5	5	5	4	4	4	4	3	4	4	4	4	3	4	4	4
5	5	4	5	5	4	4	5	4	4	5	5	4	4	4	4	3	4	4	4	4	3	4	4
4	5	5	5	4	5	5	4	4	5	5	4	4	4	4	3	3	4	4	4	3	4	4	4
4	4	4	4	5	5	4	5	5	4	4	5	3	4	4	4	4	3	4	4	4	4	3	4
5	4	5	4	5	4	5	4	5	4	5	4	4	3	4	3	4	3	4	3	4	3	4	3
3	3	4	4	3	3	4	4	3	3	4	4	3	3	4	4	3	3	4	4	3	3	4	4
4	3	3	4	4	3	3	4	4	3	3	4	4	3	3	4	4	3	3	4	4	3	3	4
3	4	4	3	3	4	4	3	3	4	4	3	3	4	4	3	3	4	4	3	3	4	4	3
3	3	3	3	4	4	4	4	3	3	3	3	4	4	4	4	3	3	3	3	4	4	4	4
4	4	4	4	3	3	3	3	4	4	4	4	3	3	3	3	4	4	4	4	3	3	3	3
1	1	2	2	1	1	2	2	1	1	2	2	1	1	2	2	1	1	2	2	1	1	2	2
2	2	1	1	2	2	1	1	2	2	1	1	2	2	1	1	2	2	1	1	2	2	1	1
1	2	1	2	1	2	1	2	1	2	1	2	1	2	1	2	1	2	1	2	1	2	1	2
2	1	2	1	2	1	2	1	2	1	2	1	2	1	2	1	2	1	2	1	2	1	2	1
2	2	2	2	1	1	1	1	2	2	2	2	1	1	1	1	2	2	2	2	1	1	1	1
5	5	4	4	4	5	5	4	5	5	4	4	4	4	3	3	4	3	4	4	4	4	3	4
4	4	5	5	5	4	5	5	4	5	5	5	3	4	4	4	4	3	4	4	4	3	4	4
5	5	4	4	5	4	3	4	5	5	5	5	4	4	3	4	4	4	4	3	4	4	4	3
5	5	5	4	4	5	5	4	5	5	4	5	4	4	3	4	4	4	3	4	4	3	4	3
5	5	5	4	5	5	5	4	5	4	5	5	4	4	3	4	4	4	3	3	4	4	4	4
5	5	4	4	5	5	4	4	5	5	5	4	4	4	4	3	4	4	4	4	3	4	4	4
5	5	4	5	5	4	4	5	4	4	5	5	4	4	4	4	3	4	4	4	4	3	4	4
4	5	5	5	4	5	5	4	4	5	5	4	4	4	4	3	3	4	4	4	3	4	4	4
4	4	4	4	5	5	4	5	5	4	4	5	3	4	4	4	4	3	4	4	4	4	3	4
5	4	5	4	5	4	5	4	5	4	5	4	4	3	4	3	4	3	4	3	4	3	4	3
3	3	4	4	3	3	4	4	3	3	4	4	3	3	4	4	3	3	4	4	3	3	4	4
4	3	3	4	4	3	3	4	4	3	3	4	4	3	3	4	4	3	3	4	4	3	3	4
3	4	4	3	3	4	4	3	3	4	4	3	3	4	4	3	3	4	4	3	3	4	4	3
3	3	3	3	4	4	4	4	3	3	3	3	4	4	4	4	3	3	3	3	4	4	4	4
4	4	4	4	3	3	3	3	4	4	4	4	3	3	3	3	4	4	4	4	3	3	3	3
1	1	2	2	1	1	2	2	1	1	2	2	1	1	2	2	1	1	2	2	1	1	2	2
2	2	1	1	2	2	1	1	2	2	1	1	2	2	1	1	2	2	1	1	2	2	1	1
1	2	1	2	1	2	1	2	1	2	1	2	1	2	1	2	1	2	1	2	1	2	1	2
2	1	2	1	2	1	2	1	2	1	2	1	2	1	2	1	2	1	2	1	2	1	2	1
2	2	2	2	1	1	1	1	2	2	2	2	1	1	1	1	2	2	2	2	1	1	1	1
5	5	4	4	4	5	5	4	5	5	4	4	4	4	3	3	4	3	4	4	4	4	3	4
4	4	5	5	5	4	5	5	4	5	5	5	3	4	4	4	4	3	4	4	4	3	4	4
5	5	4	4	5	4	3	4	5	5	5	5	4	4	3	4	4	4	4	3	4	4	4	3
5	5	5	4	4	5	5	4	5	5	4	5	4	4	3	4	4	4	3	4	4	3	4	3
5	5	5	4	5	5	5	4	5	4	5	5	4	4	3	4	4	4	3	3	4	4	4	4
5	5	4	4	5	5	4	4	5	5	5	4	4	4	4	3	4	4	4	4	3	4	4	4
5	5	4	5	5	4	4	5	4	4	5	5	4	4	4	4	3	4	4	4	4	3	4	4
4	5	5	5	4	5	5	4	4	5	5	4	4	4	4	3	3	4	4	4	3	4	4	4
4	4	4	4	5	5	4	5	5	4	4	5	3	4	4	4	4	3	4	4	4	4	3	4
5	4	5	4	5	4	5	4	5	4	5	4	4	3	4	3	4	3	4	3	4	3	4	3
3	3	4	4	3	3	4	4	3	3	4	4	3	3	4	4	3	3	4	4	3	3	4	4
4	3	3	4	4	3	3	4	4	3	3	4	4	3	3	4	4	3	3	4	4	3	3	4
3	4	4	3	3	4	4	3	3	4	4	3	3	4	4	3	3	4	4	3	3	4	4	3
3	3	3	3	4	4	4	4	3	3	3	3	4	4	4	4	3	3	3	3	4	4	4	4
4	4	4	4	3	3	3	3	4	4	4	4	3	3	3	3	4	4	4	4	3	3	3	3
1	1	2	2	1	1	2	2	1	1	2	2	1	1	2	2	1	1	2	2	1	1	2	2
2	2	1	1	2	2	1	1	2	2	1	1	2	2	1	1	2	2	1	1	2	2	1	1
1	2	1	2	1	2	1	2	1	2	1	2	1	2	1	2	1	2	1	2	1	2	1	2
2	1	2	1	2	1	2	1	2	1	2	1	2	1	2	1	2	1	2	1	2	1	2	1
2	2	2	2	1	1	1	1	2	2	2	2	1	1	1	1	2	2	2	2	1	1	1	1
