# Supplementary material
Source: Research Square preprint supplement (doi:10.21203/rs.3.rs-9679264/v1)
Supplement: Supplementary file 1 [file 3164c225da27a99ac064e480.pdf]

Supplementary Material

**Manuscript Title:** Enhancing Digital Financial Literacy and Digital Trust for Sustainable Online Loan Adoption among Micro-Entrepreneurs in Developing Economies

1. Software Information

| Item               | Detail                                                      |
|--------------------|-------------------------------------------------------------|
| Software           | JASP 0.19.6                                                 |
| Developer          | JASP Team (University of Amsterdam)                         |
| Website            | <a href="https://jasp-stats.org">https://jasp-stats.org</a> |
| SEM Engine         | lavaan package (Rosseel, 2012)                              |
| Estimator          | DWLS (Diagonally Weighted Least Squares)                    |
| Standard Errors    | Robust                                                      |
| Model Test         | Scaled and Shifted                                          |
| Information Matrix | Expected                                                    |
| License            | Open-source (GNU AGPL v3)                                   |

2. Justification for Software and Estimator Selection

2.1 Why JASP?

JASP is an open-source statistical software that provides a user-friendly GUI interface while employing well-established R packages (including lavaan) as computational engines. Its use supports:

- Reproducibility (open-source, freely available)
- Transparency (analysis steps can be replicated by reviewers)
- Rigor (lavaan is widely cited in SEM literature)

2.2 Why DWLS Estimator?

The Diagonally Weighted Least Squares (DWLS) estimator was selected because:

- The data consist of ordered categorical (Likert-scale) responses
- DWLS does not assume multivariate normality for ordinal indicators
- DWLS provides more accurate parameter estimates and standard errors compared to Maximum Likelihood for non-continuous data (Li, 2016; Bandalos, 2014)
- Robust standard errors and scaled test statistics address potential model misspecification

### 3. Complete Model Syntax

The following lavaan syntax was entered in the JASP SEM module:

# =====  
# MEASUREMENT MODEL (Confirmatory Factor Analysis)  
# =====

# Digital Financial Literacy (4 indicators)  
DFL =~ DFL1 + DFL2 + DFL3 + DFL4

# Perceived Usefulness (4 indicators)  
PU =~ PU1 + PU2 + PU3 + PU4

# Digital Trust (4 indicators)  
DT =~ DT1 + DT2 + DT3 + DT4

# Online Loan Adoption Intention (3 indicators)  
OLAI =~ OLAI1 + OLAI2 + OLAI3

# Sustainable Online Loan Use (4 indicators)  
SOLU =~ SOLU1 + SOLU2 + SOLU3 + SOLU4

# =====  
# STRUCTURAL MODEL (Path Analysis — Hypothesized Relationships)  
# =====

# H1: Digital Financial Literacy → Perceived Usefulness  
PU ~ DFL

# H2: Digital Financial Literacy → Digital Trust  
DT ~ DFL

# H3: Digital Trust → Perceived Usefulness  
PU ~ DT

# H4: Perceived Usefulness → Online Loan Adoption Intention  
OLAI ~ PU

# H5: Digital Trust → Online Loan Adoption Intention  
OLAI ~ DT

# H6: Online Loan Adoption Intention → Sustainable Online Loan Use  
SOLU ~ OLAI

# =====  
# RESIDUAL COVARIANCE SPECIFICATION  
# =====

# Correlated residual between DFL3 and DFL4

# Theoretical justification: Both items measure practical application  
 # of digital financial security knowledge (risk identification and  
 # information protection). Empirical support: MI = 47.96.  
 DFL3  $\sim\sim$  DFL4

#### 4. Syntax Notation Guide (lavaan)

| Operator   | Meaning                                    | Example              |
|------------|--------------------------------------------|----------------------|
| =~         | "is measured by" (factor loading)          | DFL =~ DFL1 + DFL2   |
| ~          | "is regressed on" (structural path)        | PU ~ DFL             |
| $\sim\sim$ | "is correlated with" (covariance/variance) | DFL3 $\sim\sim$ DFL4 |
| +          | separates indicators/predictors            | DFL1 + DFL2 + DFL3   |
| #          | comment (not executed)                     | # This is a comment  |

#### 5. JASP Analysis Settings

##### 5.1 Data Preparation

| Step | Action                                                   |
|------|----------------------------------------------------------|
| 1    | Open Supplementary_Data.xlsx in JASP                     |
| 2    | Set all 24 variables as <b>Ordinal</b> measurement level |
| 3    | Verify N = 320 cases loaded correctly                    |
| 4    | Confirm no missing values detected                       |

##### 5.2 SEM Module Configuration

Navigate to: SEM → Structural Equation Modeling

| Setting | Selection                         |
|---------|-----------------------------------|
| Model   | Enter syntax from Section 3 above |

| Setting               | Selection                        |
|-----------------------|----------------------------------|
| Estimator             | DWLS                             |
| Standard Errors       | Robust                           |
| Model Test            | Scaled and shifted               |
| Information Matrix    | Expected                         |
| Mimic                 | lavaan                           |
| Missing Data Handling | Listwise (N/A — no missing data) |

### 5.3 Output Options Selected

| Category                    | Options Checked                                                        |
|-----------------------------|------------------------------------------------------------------------|
| <b>Estimates</b>            | <input checked="" type="checkbox"/> Standardized estimates             |
|                             | <input checked="" type="checkbox"/> Confidence intervals (95%)         |
|                             | <input checked="" type="checkbox"/> R-squared                          |
| <b>Fit Measures</b>         | <input checked="" type="checkbox"/> Additional fit measures            |
|                             | <input checked="" type="checkbox"/> RMSEA 90% CI                       |
| <b>Modification Indices</b> | <input checked="" type="checkbox"/> Show modification indices          |
|                             | <input checked="" type="checkbox"/> Threshold: 10.0                    |
| <b>Advanced</b>             | <input checked="" type="checkbox"/> Residual covariances               |
|                             | <input checked="" type="checkbox"/> AVE (Average Variance Extracted)   |
|                             | <input checked="" type="checkbox"/> HTMT (Heterotrait-Monotrait Ratio) |

| Category    | Options Checked                                                                              |
|-------------|----------------------------------------------------------------------------------------------|
|             | <input checked="" type="checkbox"/> Reliability (Cronbach's $\alpha$ , McDonald's $\omega$ ) |
|             | <input checked="" type="checkbox"/> Indirect effects                                         |
|             | <input checked="" type="checkbox"/> Total effects                                            |
| <b>Plot</b> | <input checked="" type="checkbox"/> Path diagram                                             |
|             | <input checked="" type="checkbox"/> Standardized estimates on diagram                        |

## 6. Model Specification Summary

### 6.1 Model Components

| Component                      | Count                                       |
|--------------------------------|---------------------------------------------|
| Latent variables (factors)     | 5                                           |
| Observed indicators            | 19 (DFL: 4, PU: 4, DT: 4, OLAI: 3, SOLU: 4) |
| Structural paths (regressions) | 6                                           |
| Residual covariances specified | 1 (DFL3 $\sim$ DFL4)                        |
| Total free parameters          | 95                                          |
| Degrees of freedom             | 145                                         |

### 6.2 Structural Paths and Hypotheses

| Path                 | Hypothesis                     | Direction |
|----------------------|--------------------------------|-----------|
| DFL $\rightarrow$ PU | H1: DFL positively predicts PU | +         |
| DFL $\rightarrow$ DT | H2: DFL positively predicts DT | +         |
| DT $\rightarrow$ PU  | H3: DT positively predicts PU  | +         |

| Path        | Hypothesis                        | Direction |
|-------------|-----------------------------------|-----------|
| PU → OLAI   | H4: PU positively predicts OLAI   | +         |
| DT → OLAI   | H5: DT positively predicts OLAI   | +         |
| OLAI → SOLU | H6: OLAI positively predicts SOLU | +         |

### 6.3 Indirect Effects Tested

| Pathway                     | Mediator(s)                   |
|-----------------------------|-------------------------------|
| DFL → PU → OLAI             | PU mediates DFL–OLAI          |
| DFL → DT → OLAI             | DT mediates DFL–OLAI          |
| DFL → DT → PU → OLAI        | Serial mediation (DT then PU) |
| DFL → PU → OLAI → SOLU      | Sequential: PU then OLAI      |
| DFL → DT → OLAI → SOLU      | Sequential: DT then OLAI      |
| DFL → DT → PU → OLAI → SOLU | Full serial mediation         |
| PU → OLAI → SOLU            | OLAI mediates PU–SOLU         |
| DT → OLAI → SOLU            | OLAI mediates DT–SOLU         |
| DT → PU → OLAI              | PU mediates DT–OLAI           |
| DT → PU → OLAI → SOLU       | Sequential: PU then OLAI      |

## 7. Key Results Summary

### 7.1 Model Fit

| Index         | Value          | Threshold | Interpretation |
|---------------|----------------|-----------|----------------|
| $\chi^2(145)$ | 314.7          | —         | $p < .001$     |
| $\chi^2/df$   | 2.170          | $< 3.0$   | Good           |
| CFI           | 0.974          | $> 0.95$  | Excellent      |
| TLI           | 0.969          | $> 0.95$  | Good           |
| NFI           | 0.953          | $> 0.90$  | Good           |
| RMSEA         | 0.073          | $< 0.08$  | Acceptable     |
| RMSEA 90% CI  | [0.062, 0.084] | —         | —              |
| SRMR          | 0.063          | $< 0.08$  | Good           |
| GFI           | 0.991          | $> 0.90$  | Excellent      |

### 7.2 Direct Effects

| Path        | $\beta$ | SE    | z     | p        | Result        |
|-------------|---------|-------|-------|----------|---------------|
| DFL → DT    | 0.834   | 0.036 | 23.34 | $< .001$ | Supported     |
| DFL → PU    | 0.510   | 0.126 | 4.032 | $< .001$ | Supported     |
| DT → PU     | 0.234   | 0.122 | 1.915 | .055     | Not supported |
| PU → OLAI   | 0.442   | 0.071 | 6.243 | $< .001$ | Supported     |
| DT → OLAI   | 0.457   | 0.065 | 7.005 | $< .001$ | Supported     |
| OLAI → SOLU | 0.945   | 0.037 | 25.39 | $< .001$ | Supported     |

### 7.3 Variance Explained ( $R^2$ )

| Endogenous Variable | R <sup>2</sup> | Interpretation                         |
|---------------------|----------------|----------------------------------------|
| DT                  | 0.695          | DFL explains 69.5% of DT variance      |
| PU                  | 0.514          | DFL + DT explain 51.4% of PU variance  |
| OLAI                | 0.671          | PU + DT explain 67.1% of OLAI variance |
| SOLU                | 0.893          | OLAI explains 89.3% of SOLU variance   |

## 8. Reproducibility Instructions

To replicate this analysis:

1. Download and install JASP 0.19.6 from <https://jasp-stats.org>
2. Open the supplementary data file (Supplementary\_Data.xlsx)
3. Set all variables to **Ordinal** scale
4. Navigate to SEM → Structural Equation Modeling
5. Copy and paste the syntax from Section 3 into the model specification field
6. Configure settings as specified in Section 5
7. Run the analysis

All results reported in the manuscript should be reproduced exactly.

## 9. References

- Bandalos, D. L. (2014). Relative performance of categorical diagonally weighted least squares and robust maximum likelihood estimation. *Structural Equation Modeling*, 21(1), 102–116.
- Hair, J. F., Black, W. C., Babin, B. J., & Anderson, R. E. (2019). *Multivariate Data Analysis* (8th ed.). Cengage.
- Hu, L., & Bentler, P. M. (1999). Cutoff criteria for fit indexes in covariance structure analysis. *Structural Equation Modeling*, 6(1), 1–55.
- JASP Team (2024). JASP (Version 0.19.6) [Computer software]. <https://jasp-stats.org>
- Li, C.-H. (2016). Confirmatory factor analysis with ordinal data: Comparing robust maximum likelihood and diagonally weighted least squares. *Behavior Research Methods*, 48(3), 936–949.
- Rosseel, Y. (2012). lavaan: An R package for structural equation modeling. *Journal of Statistical Software*, 48(2), 1–36.
