# Supplementary material
Source: Research Square preprint supplement (doi:10.21203/rs.3.rs-9679264/v1)
Supplement: Supplementary file 2 [file 46eb59040b1607b02cd24a89.pdf]

## CODEBOOK

### Supplementary Material

**Manuscript Title:** Enhancing Digital Financial Literacy and Digital Trust for Sustainable Online Loan Adoption among Micro-Entrepreneurs in Developing Economies

#### 1. Dataset Overview

| <b>Property</b>   | <b>Detail</b>                                   |
|-------------------|-------------------------------------------------|
| File Name         | Supplementary_Data.xlsx                         |
| Sample Size (N)   | 320                                             |
| Total Variables   | 24 observed indicators                          |
| Latent Constructs | 6                                               |
| Data Type         | Ordinal (Likert-scale responses)                |
| Missing Values    | 0 (complete dataset)                            |
| Collection Method | Self-administered structured questionnaire      |
| De-identification | All personally identifiable information removed |

#### 2. Measurement Scale

All items were measured using a 5-point Likert scale:

| <b>Value</b> | <b>Label</b>                         |
|--------------|--------------------------------------|
| 5            | Strongly Agree                       |
| 4            | Agree                                |
| 3            | Neutral / Neither Agree nor Disagree |
| 2            | Disagree                             |
| 1            | Strongly Disagree                    |

### 3. Construct Summary

| Construct                      | Abbreviation | Items | Scale Range | Cronbach's $\alpha$ | McDonald's $\omega$ | AVE   |
|--------------------------------|--------------|-------|-------------|---------------------|---------------------|-------|
| Digital Financial Literacy     | DFL          | 4     | 1–5         | 0.896               | 0.869               | 0.688 |
| Perceived Usefulness           | PU           | 4     | 1–5         | 0.906               | 0.887               | 0.730 |
| Digital Trust                  | DT           | 4     | 1–5         | 0.891               | 0.892               | 0.728 |
| Online Loan Adoption Intention | OLAI         | 3     | 1–5         | 0.826               | 0.753               | 0.648 |
| Sustainable Online Loan Use    | SOLU         | 4     | 1–5         | 0.819               | 0.798               | 0.604 |
| Digital Financial Capability   | DFC          | 5     | 1–5         | 0.915               | —                   | —     |

### 4. Variable Definitions and Item Wordings

#### 4.1 Digital Financial Literacy (DFL)

**Definition:** The knowledge and skills required to effectively manage digital financial tools, understand online transaction terms and conditions, identify digital financial risks, and securely manage online financial information.

| Code | Item Wording                                                                                     | Mean  | SD    | Min | Max | Std. Loading |
|------|--------------------------------------------------------------------------------------------------|-------|-------|-----|-----|--------------|
| DFL1 | I have adequate knowledge and skills to use digital financial tools effectively and efficiently. | 4.072 | 1.113 | 1   | 5   | 0.946        |
| DFL2 | I understand the terms, conditions, and regulations governing online financial transactions.     | 4.116 | 1.165 | 1   | 5   | 0.945        |

| Code | Item Wording                                                                               | Mean  | SD    | Min | Max | Std. Loading |
|------|--------------------------------------------------------------------------------------------|-------|-------|-----|-----|--------------|
| DFL3 | I can identify financial risks and threats associated with digital financial transactions. | 3.975 | 1.100 | 1   | 5   | 0.701        |
| DFL4 | I can manage and protect my online financial information securely and appropriately.       | 4.022 | 1.078 | 1   | 5   | 0.687        |

**Note:** A residual covariance between DFL3 and DFL4 ( $r = 0.702$ ,  $p < .001$ ) was specified in the structural model. Both items relate to the practical application of digital financial security knowledge (identifying risks and managing/protecting information), justifying this specification both theoretically and empirically ( $MI = 47.96$ ).

#### 4.2 Perceived Usefulness (PU)

**Definition:** The extent to which a micro-entrepreneur believes that using online loan services will enhance business efficiency, improve access to capital, achieve financial goals, and provide overall business benefits.

| Code | Item Wording                                                                                    | Mean  | SD    | Min | Max | Std. Loading |
|------|-------------------------------------------------------------------------------------------------|-------|-------|-----|-----|--------------|
| PU1  | Using online loan services will increase the operational efficiency of my business.             | 4.028 | 1.191 | 1   | 5   | 0.849        |
| PU2  | Online loan services will provide me with faster and more convenient access to capital sources. | 4.041 | 1.186 | 1   | 5   | 0.925        |
| PU3  | Using online lending platforms will help me achieve my financial goals more effectively.        | 3.966 | 1.175 | 1   | 5   | 0.865        |
| PU4  | Overall, I believe that online loan services are beneficial for my business operations.         | 3.978 | 1.127 | 1   | 5   | 0.771        |

#### 4.3 Digital Trust (DT)

**Definition:** The confidence and reliability a micro-entrepreneur has toward online lending platforms, including trust in security measures, institutional credibility, transaction transparency, and personal data protection.

| Code | Item Wording                                                                                    | Mean  | SD    | Min | Max | Std. Loading |
|------|-------------------------------------------------------------------------------------------------|-------|-------|-----|-----|--------------|
| DT1  | I trust in the security and confidentiality measures of online lending platforms.               | 3.991 | 1.135 | 1   | 5   | 0.835        |
| DT2  | I have confidence in the credibility and service quality of online financial institutions.      | 4.041 | 1.115 | 1   | 5   | 0.906        |
| DT3  | I believe that online lending platforms will conduct transactions accurately and transparently. | 4.078 | 1.096 | 1   | 5   | 0.880        |
| DT4  | I am confident that my personal and financial information will be properly protected.           | 4.009 | 1.138 | 1   | 5   | 0.788        |

#### 4.4 Online Loan Adoption Intention (OLAI)

**Definition:** The micro-entrepreneur's motivation and willingness to adopt and use online lending services for business capital needs, including intentions to apply and recommend services to others.

| Code  | Item Wording                                                                | Mean  | SD    | Min | Max | Std. Loading |
|-------|-----------------------------------------------------------------------------|-------|-------|-----|-----|--------------|
| OLAI1 | I intend to use online loan services in the near future.                    | 3.359 | 0.895 | 1   | 4   | 0.816        |
| OLAI2 | I plan to use online lending platforms to meet my business capital needs.   | 3.381 | 0.898 | 1   | 4   | 0.850        |
| OLAI3 | I am likely to recommend online loan services to other micro-entrepreneurs. | 3.334 | 0.884 | 1   | 4   | 0.746        |

**Note on item removal:** The original construct contained 4 items. OLAI4 ("I am confident that I can use digital financial tools to increase business opportunities") was removed after confirmatory factor analysis due to cross-loading with the Digital Financial Capability (DFC) construct (standardized loading > 0.40 on both OLAI and DFC factors). The 3-item scale maintains adequate reliability ( $\alpha = 0.826$ ) and convergent validity (AVE = 0.648).

#### 4.5 Sustainable Online Loan Use (SOLU)

**Definition:** The micro-entrepreneur's commitment and ability to maintain ongoing, responsible use of online lending services, including consistent loan repayment and long-term engagement with digital lending platforms.

| Code  | Item Wording                                                                             | Mean  | SD    | Min | Max | Std. Loading |
|-------|------------------------------------------------------------------------------------------|-------|-------|-----|-----|--------------|
| SOLU1 | I will continuously use online loan services to meet my ongoing business capital needs.  | 3.325 | 0.889 | 1   | 4   | 0.831        |
| SOLU2 | I am committed to repaying loans through online platforms according to agreed schedules. | 3.428 | 0.846 | 1   | 4   | 0.751        |
| SOLU3 | I will rely on online lending as my primary source of capital in the long term.          | 3.291 | 0.842 | 1   | 4   | 0.781        |
| SOLU4 | I will establish and maintain a positive service history with online lending platforms.  | 3.409 | 0.829 | 1   | 4   | 0.742        |

#### 4.6 Digital Financial Capability (DFC)

**Definition:** The micro-entrepreneur's practical ability and behavioral competence in applying digital financial knowledge to real-world financial decision-making, including evaluating financial products, managing transactions independently, and adapting to new technologies.

**Note:** This construct captures the behavioral dimension of financial competence beyond cognitive literacy (DFL). While DFL measures knowledge ("knowing"), DFC measures application ("doing"), consistent with the World Bank Digital Financial Capability Framework (World Bank, 2022).

| Code | Item Wording                                                                                                     | Mean  | SD    | Min | Max |
|------|------------------------------------------------------------------------------------------------------------------|-------|-------|-----|-----|
| DFC1 | I can effectively compare and evaluate different online financial products and services before making decisions. | 3.416 | 0.856 | 1   | 4   |
| DFC2 | I can manage my digital financial transactions and budgeting independently without external assistance.          | 3.381 | 0.866 | 1   | 4   |

| Code | Item Wording                                                                                   | Mean  | SD    | Min | Max |
|------|------------------------------------------------------------------------------------------------|-------|-------|-----|-----|
| DFC3 | I can adapt to new digital financial tools and platforms as they become available.             | 3.341 | 0.830 | 1   | 4   |
| DFC4 | I can apply my financial knowledge to make sound borrowing decisions through online platforms. | 3.416 | 0.845 | 1   | 4   |
| DFC5 | I can effectively use digital tools to monitor and control my loan repayment obligations.      | 3.394 | 0.861 | 1   | 4   |

**Note:** DFC was included in the survey but not in the structural model tested. It serves as a descriptive variable and potential control/covariate for future analysis.

## 5. Coding Information

### 5.1 General Coding Rules

- All items are positively worded — no reverse coding required
- Values are integer scores from 1 to 5
- No data transformations (log, square root, etc.) were applied
- Composite scores are calculated as the arithmetic mean of respective indicator items

### 5.2 Construct Score Computation

| Construct | Formula                                  |
|-----------|------------------------------------------|
| DFL_mean  | $(DFL1 + DFL2 + DFL3 + DFL4) / 4$        |
| PU_mean   | $(PU1 + PU2 + PU3 + PU4) / 4$            |
| DT_mean   | $(DT1 + DT2 + DT3 + DT4) / 4$            |
| OLAI_mean | $(OLAI1 + OLAI2 + OLAI3) / 3$            |
| SOLU_mean | $(SOLU1 + SOLU2 + SOLU3 + SOLU4) / 4$    |
| DFC_mean  | $(DFC1 + DFC2 + DFC3 + DFC4 + DFC5) / 5$ |

#### 6. Inter-Construct Correlation Matrix

|      | <b>DFL</b> | <b>PU</b> | <b>DT</b> | <b>OLAI</b> | <b>SOLU</b> | <b>DFC</b> |
|------|------------|-----------|-----------|-------------|-------------|------------|
| DFL  | 1.000      |           |           |             |             |            |
| PU   | 0.843      | 1.000     |           |             |             |            |
| DT   | 0.886      | 0.831     | 1.000     |             |             |            |
| OLAI | 0.769      | 0.817     | 0.780     | 1.000       |             |            |
| SOLU | 0.783      | 0.800     | 0.809     | 0.844       | 1.000       |            |
| DFC  | 0.800      | 0.828     | 0.780     | 0.848       | 0.894       | 1.000      |

#### 7. Discriminant Validity: HTMT Ratio

|      | <b>DFL</b> | <b>PU</b> | <b>DT</b> | <b>OLAI</b> | <b>SOLU</b> |
|------|------------|-----------|-----------|-------------|-------------|
| DFL  | —          |           |           |             |             |
| PU   | 0.724      | —         |           |             |             |
| DT   | 0.877      | 0.685     | —         |             |             |
| OLAI | 0.734      | 0.712     | 0.712     | —           |             |
| SOLU | 0.696      | 0.710     | 0.717     | 0.883       | —           |

*Note: All HTMT values < 0.90 (Gold et al., 2001), supporting discriminant validity.*

#### 8. File Structure (Column Order in Dataset)

| <b>Position</b> | <b>Code</b> | <b>Construct</b>           | <b>Items in Model</b> |
|-----------------|-------------|----------------------------|-----------------------|
| 1               | DFL1        | Digital Financial Literacy | Yes                   |
| 2               | DFL2        | Digital Financial Literacy | Yes                   |

| <b>Position</b> | <b>Code</b> | <b>Construct</b>               | <b>Items in Model</b> |
|-----------------|-------------|--------------------------------|-----------------------|
| 3               | DFL3        | Digital Financial Literacy     | Yes                   |
| 4               | DFL4        | Digital Financial Literacy     | Yes                   |
| 5               | PU1         | Perceived Usefulness           | Yes                   |
| 6               | PU2         | Perceived Usefulness           | Yes                   |
| 7               | PU3         | Perceived Usefulness           | Yes                   |
| 8               | PU4         | Perceived Usefulness           | Yes                   |
| 9               | DT1         | Digital Trust                  | Yes                   |
| 10              | DT2         | Digital Trust                  | Yes                   |
| 11              | DT3         | Digital Trust                  | Yes                   |
| 12              | DT4         | Digital Trust                  | Yes                   |
| 13              | OLAI1       | Online Loan Adoption Intention | Yes                   |
| 14              | OLAI2       | Online Loan Adoption Intention | Yes                   |
| 15              | OLAI3       | Online Loan Adoption Intention | Yes                   |
| 16              | SOLU1       | Sustainable Online Loan Use    | Yes                   |
| 17              | SOLU2       | Sustainable Online Loan Use    | Yes                   |
| 18              | SOLU3       | Sustainable Online Loan Use    | Yes                   |
| 19              | SOLU4       | Sustainable Online Loan Use    | Yes                   |
| 20              | DFC1        | Digital Financial Capability   | Descriptive only      |
| 21              | DFC2        | Digital Financial Capability   | Descriptive only      |

| Position | Code | Construct                    | Items in Model   |
|----------|------|------------------------------|------------------|
| 22       | DFC3 | Digital Financial Capability | Descriptive only |
| 23       | DFC4 | Digital Financial Capability | Descriptive only |
| 24       | DFC5 | Digital Financial Capability | Descriptive only |

## 9. Notes for Reviewers

1. **De-identification:** This dataset contains no personally identifiable information. All responses are anonymous.
2. **OLAI4 Removal:** Item OLAI4 was removed after CFA due to cross-loading with DFC. The 3-item OLAI scale maintains good reliability ( $\alpha = 0.826$ ) and adequate AVE ( $0.648 > 0.50$ ).
3. **DFC Construct:** DFC was measured but not included in the structural model. It is provided for descriptive purposes and as a resource for future research replication.
4. **Observed Score Range:** OLAI, SOLU, and DFC items show an observed maximum of 4 (out of 5). This reflects respondent conservatism toward strong agreement on behavioral intention and capability items — a pattern consistent with developing economy contexts where digital financial adoption remains in early stages.
5. **Residual Covariance (DFL3  $\sim$  DFL4):** Both items share conceptual overlap related to digital financial security practices. The specification is supported by modification index ( $MI = 47.96$ ) and theoretical reasoning.
