# Supplementary material
Source: Research Square preprint supplement (doi:10.21203/rs.3.rs-9679264/v1)
Supplement: Supplementary file 3 [file 642bfdc750285bb495946359.pdf]

## Data Collection Protocol

**Study Title:** Enhancing Digital Financial Literacy and Digital Trust for Sustainable Online Loan Adoption among Micro-Entrepreneurs in Developing Economies

**Ethical Approval:** Certificate of Exemption, Ethics Committee for Human Research, Bangkok University, Thailand (Reference No. 416803099, approved October 10, 2025)

### 1. Study Design

| Item      | Description                                                                       |
|-----------|-----------------------------------------------------------------------------------|
| Design    | Cross-sectional survey research                                                   |
| Approach  | Quantitative                                                                      |
| Framework | Integrated Technology Acceptance Model (TAM) and Theory of Planned Behavior (TPB) |
| Analysis  | Structural Equation Modeling (SEM) using DWLS estimator                           |

### 2. Target Population

| Criterion        | Specification                                                                                            |
|------------------|----------------------------------------------------------------------------------------------------------|
| Population       | Micro-entrepreneurs in Thailand                                                                          |
| Definition       | Business owners with $\leq 5$ employees and annual revenue $\leq 1.8$ million THB (per OSMEP definition) |
| Geographic scope | Six metropolitan provinces in Thailand                                                                   |
| Age requirement  | 18 years or older                                                                                        |
| Business status  | Currently operating a registered or informal micro-enterprise                                            |
| Digital access   | Must have access to a smartphone or computer with internet connectivity                                  |

### 3. Sampling Strategy

#### 3.1 Sampling Method

**Multi-stage purposive sampling** combined with convenience sampling

Stage 1: Selection of six metropolitan provinces representing geographic diversity

Stage 2: Identification of micro-entrepreneur clusters (markets, commercial districts, co-working spaces, online seller groups)

Stage 3: Purposive selection of participants meeting eligibility criteria

3.2 Sample Size Determination

| <b>Method</b>                     | <b>Calculation</b>                                   | <b>Result</b>  |
|-----------------------------------|------------------------------------------------------|----------------|
| Kline (2016) recommendation       | $\geq 200$ for SEM with 5+ latent variables          | $N \geq 200$   |
| Ratio of cases to parameters      | 10:1 ratio $\times$ 24 observed variables            | $N \geq 240$   |
| Hair et al. (2019) recommendation | $\geq 300$ for models with $\geq 5$ constructs       | $N \geq 300$   |
| <b>Target sample size</b>         | <b>Accounting for potential incomplete responses</b> | <b>N = 350</b> |
| <b>Final valid responses</b>      | <b>After screening</b>                               | <b>N = 320</b> |

3.3 Inclusion Criteria

1. Aged 18 years or older
2. Currently operating a micro-enterprise ( $\leq 5$  employees)
3. Located in one of the six target metropolitan provinces
4. Has access to digital devices (smartphone/computer) with internet
5. Willing to provide informed consent

3.4 Exclusion Criteria

1. Employees of financial institutions or FinTech companies
2. Individuals under 18 years of age
3. Non-business owners (e.g., salaried employees only)

4. Research Instrument

4.1 Questionnaire Structure

| Section      | Content                               | Items                 |
|--------------|---------------------------------------|-----------------------|
| Part 1       | Demographic information               | 6 items               |
| Part 2       | Digital Financial Literacy (DFL)      | 4 items (DFL1–DFL4)   |
| Part 3       | Perceived Usefulness (PU)             | 4 items (PU1–PU4)     |
| Part 4       | Digital Trust (DT)                    | 4 items (DT1–DT4)     |
| Part 5       | Online Loan Adoption Intention (OLAI) | 3 items (OLAI1–OLAI3) |
| Part 6       | Sustainable Online Loan Use (SOLU)    | 4 items (SOLU1–SOLU4) |
| Part 7       | Digital Financial Capability (DFC)    | 5 items (DFC1–DFC5)   |
| <b>Total</b> |                                       | <b>30 items</b>       |

#### 4.2 Measurement Scale

- All construct items measured on a **5-point Likert scale**:
  - 1 = Strongly Disagree
  - 2 = Disagree
  - 3 = Neutral
  - 4 = Agree
  - 5 = Strongly Agree

#### 4.3 Instrument Development and Validation

- Items adapted from established scales in the literature
- Content validity assessed by expert panel review
- Principal Investigator: Faculty of Communication Arts, Bangkok University
- Language: Thai (with English back-translation verification)

### 5. Data Collection Procedures

#### 5.1 Timeline

| Phase   | Activity                                     | Duration |
|---------|----------------------------------------------|----------|
| Phase 1 | Instrument development and expert validation | 4 weeks  |
| Phase 2 | Pilot testing (n = 30)                       | 2 weeks  |
| Phase 3 | Main data collection                         | 6 weeks  |
| Phase 4 | Data cleaning and analysis                   | 4 weeks  |

## 5.2 Administration Mode

- **Primary:** Online self-administered questionnaire (Google Forms)
- **Secondary:** Paper-based questionnaire for participants with limited digital access
- Both modes contained identical items and instructions

## 5.3 Collection Procedure (Step-by-Step)

1. **Approach:** Research assistants identified eligible micro-entrepreneurs at business locations, online seller communities, and entrepreneur networks
2. **Screening:** Eligibility verified through brief screening questions
3. **Consent:** Participants read the informed consent information and voluntarily agreed to participate
4. **Administration:** Questionnaire link provided (online) or paper form distributed (offline)
5. **Completion:** Average completion time: 10–15 minutes
6. **Collection:** Online responses recorded automatically; paper forms collected on-site
7. **Verification:** All responses checked for completeness before data entry

## 5.4 Quality Control Measures

| Measure              | Implementation                                                                   |
|----------------------|----------------------------------------------------------------------------------|
| Training             | Research assistants trained on ethical protocols and standardised administration |
| Monitoring           | Daily review of incoming responses for quality and completeness                  |
| Duplicate prevention | One response per participant (IP tracking for online; ID check for offline)      |
| Missing data         | Incomplete responses flagged; follow-up attempted within 48 hours                |

| Measure    | Implementation                                      |
|------------|-----------------------------------------------------|
| Data entry | Double-entry verification for paper-based responses |

## 6. Ethical Considerations

### 6.1 Informed Consent

- All participants provided informed consent before completing the questionnaire
- Consent form explained: study purpose, voluntary participation, right to withdraw, confidentiality assurance, and data usage
- Participants could withdraw at any time without consequences

### 6.2 Anonymity and Confidentiality

- No personally identifiable information (names, addresses, ID numbers) collected
- Responses coded with numerical identifiers only
- Data stored on password-protected devices accessible only to the research team
- Results reported in aggregate form only

### 6.3 Data Protection

- Data stored in compliance with Thailand's Personal Data Protection Act (PDPA) B.E. 2562 (2019)
- Electronic data encrypted and backed up on secure university servers
- Retention period: 5 years after publication, then securely destroyed

## 7. Data Screening and Preparation

### 7.1 Software Used

- **SPSS 28.0** — Data screening, descriptive statistics, missing data analysis

### 7.2 Screening Procedures

| Step | Procedure                                       | Result                         |
|------|-------------------------------------------------|--------------------------------|
| 1    | Missing value analysis (Little's MCAR test)     | No missing values (N = 320)    |
| 2    | Univariate outlier detection (z-scores > ±3.29) | No extreme outliers identified |

| Step | Procedure                                             | Result                         |
|------|-------------------------------------------------------|--------------------------------|
| 3    | Multivariate outlier detection (Mahalanobis distance) | No cases removed               |
| 4    | Distributional assessment (skewness/kurtosis)         | Values within acceptable range |
| 5    | Multicollinearity check (VIF < 5.0)                   | No multicollinearity issues    |

### 7.3 Final Dataset

- **Valid responses:** N = 320
- **Response rate:** 91.4% (320 valid out of 350 distributed)
- **Missing data:** 0% (complete dataset)

## 8. Statistical Analysis Plan

### 8.1 Analysis Software

- **JASP 0.19.6** — Structural Equation Modeling (SEM module)
- Backend engine: lavaan package (Rosseel, 2012)

### 8.2 Estimation Method

- **Diagonally Weighted Least Squares (DWLS)** with robust standard errors
- Appropriate for ordered categorical (5-point Likert) data
- Does not assume multivariate normality

### 8.3 Two-Step SEM Approach (Anderson & Gerbing, 1988)

| Step   | Analysis                           | Purpose                             |
|--------|------------------------------------|-------------------------------------|
| Step 1 | Confirmatory Factor Analysis (CFA) | Evaluate measurement model validity |
| Step 2 | Structural Path Analysis           | Test hypothesised relationships     |

### 8.4 Model Fit Criteria

| Index | Threshold | Reference           |
|-------|-----------|---------------------|
| CFI   | > 0.95    | Hu & Bentler (1999) |

| Index       | Threshold | Reference           |
|-------------|-----------|---------------------|
| TLI         | > 0.95    | Hu & Bentler (1999) |
| RMSEA       | < 0.08    | Hu & Bentler (1999) |
| SRMR        | < 0.08    | Hu & Bentler (1999) |
| $\chi^2/df$ | < 3.0     | Kline (2016)        |

### 8.5 Validity Assessment

| Type                  | Criterion                 | Threshold                                          |
|-----------------------|---------------------------|----------------------------------------------------|
| Convergent validity   | AVE                       | > 0.50                                             |
| Convergent validity   | CR                        | > 0.70                                             |
| Discriminant validity | Fornell-Larcker criterion | $\sqrt{AVE} > \text{inter-construct correlations}$ |
| Discriminant validity | HTMT                      | < 0.90                                             |

### 8.6 Mediation Analysis

- Product-of-coefficients approach with robust standard errors
- Specific indirect effects calculated for each mediation pathway
- 95% confidence intervals to assess significance

### 9. Participant Demographics Summary (N = 320)

| Characteristic  | Category            | Frequency | Percentage |
|-----------------|---------------------|-----------|------------|
| Gender          | Male                | 142       | 44.4%      |
|                 | Female              | 178       | 55.6%      |
| Age             | 18-30 years         | 87        | 27.2%      |
|                 | 31-40 years         | 126       | 39.4%      |
|                 | 41-50 years         | 78        | 24.4%      |
|                 | >50 years           | 29        | 9.1%       |
| Education Level | High school or less | 45        | 14.1%      |

|                              |                    |     |       |
|------------------------------|--------------------|-----|-------|
|                              | Vocational/Diploma | 98  | 30.6% |
|                              | Bachelor's degree  | 142 | 44.4% |
|                              | Graduate degree    | 35  | 10.9% |
| Business Sector              | Retail/E-commerce  | 112 | 35.0% |
|                              | Food & Beverage    | 89  | 27.8% |
|                              | Services           | 76  | 23.8% |
|                              | Manufacturing      | 43  | 13.4% |
| Business Age                 | <1 year            | 34  | 10.6% |
|                              | 1-3 years          | 128 | 40.0% |
|                              | 3-5 years          | 98  | 30.6% |
|                              | >5 years           | 60  | 18.8% |
| Annual Revenue (THB)         | <300,000           | 89  | 27.8% |
|                              | 300,000-900,000    | 143 | 44.7% |
|                              | 900,001-1,800,000  | 88  | 27.5% |
| Prior Online Loan Experience | Yes                | 134 | 41.9% |
|                              | No                 | 186 | 58.1% |

## 10. References

- Anderson, J. C., & Gerbing, D. W. (1988). Structural equation modeling in practice: A review and recommended two-step approach. *Psychological Bulletin*, 103(3), 411–423.
- Hair, J. F., Black, W. C., Babin, B. J., & Anderson, R. E. (2019). *Multivariate Data Analysis* (8th ed.). Cengage.
- Hu, L., & Bentler, P. M. (1999). Cutoff criteria for fit indexes in covariance structure analysis. *Structural Equation Modeling*, 6(1), 1–55.
- JASP Team (2024). JASP (Version 0.19.6) [Computer software]. <https://jasp-stats.org>
- Kline, R. B. (2016). *Principles and Practice of Structural Equation Modeling* (4th ed.). Guilford Press.
- Li, C.-H. (2016). Confirmatory factor analysis with ordinal data: Comparing robust maximum likelihood and diagonally weighted least squares. *Behavior Research Methods*, 48(3), 936–949.
- Rosseel, Y. (2012). lavaan: An R package for structural equation modeling. *Journal of Statistical Software*, 48(2), 1–36.
